# Supplementary material
Source: Springer Nature journal article supplement (https://www.springermedizin.de/resource/supplementary/12885_2012_3425_MOESM5_ESM.pdf/9462868)

A.

Mean tumor volume (n=8)

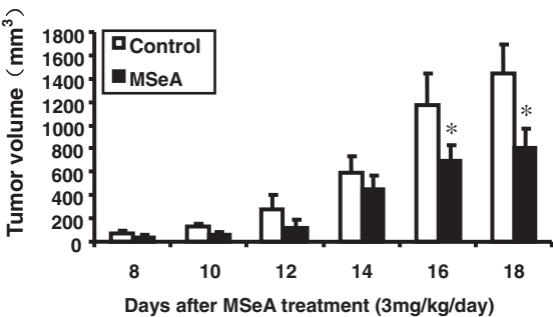

B.

Mean tumor weight (day 19, n=8)

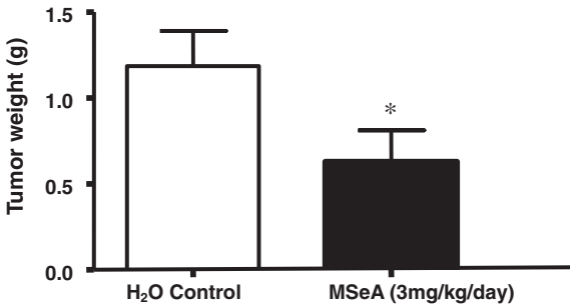

Supplement: MOESM5 [file 9462868]
